# Supplementary material for: Artificial Intelligence in the Eyes of Society: Assessing Social Risk and Social Value Perception in a Novel Classification
Source: Hindawi journal article supplement (doi:10.1155/2024/7008056), 2024-03-11
Supplement: f1 [file 7008056.f1.docx]

**Artificial Intelligence in the Eyes of Society:**

**Assessing Social Risk and Social Value Perception in a Novel Classification**

**Supplementary materials**

**Supplementary materials for the Preliminary Study**

**Table A.** *Full list of participants' nationalities for the Preliminary Study.*

| **Nationality** | **N** | **%** |
| --- | --- | --- |
| American | 3 | 1.0 |
| Austrian | 2 | 0.7 |
| Belgian | 4 | 1.4 |
| Brazilian | 1 | 0.3 |
| British | 28 | 9.7 |
| Chilean | 5 | 1.7 |
| Chinese | 3 | 1.0 |
| Czech | 2 | 0.7 |
| Dutch | 4 | 1.4 |
| Egyptian | 1 | 0.3 |
| English | 7 | 2.4 |
| Estonian | 5 | 1.7 |
| Filipino | 1 | 0.3 |
| French | 3 | 1.0 |
| German | 1 | 0.3 |
| Gibraltarian | 1 | 0.3 |
| Greek | 20 | 6.9 |
| Hungarian | 6 | 2.1 |
| Indian | 2 | 0.7 |
| Irish | 3 | 1.0 |
| Italian | 34 | 11.7 |
| Latvian | 1 | 0.3 |
| Mexican | 5 | 1.7 |
| Moldovan | 1 | 0.3 |
| Northern Irish | 1 | 0.3 |
| Norwegian | 1 | 0.3 |
| Polish | 74 | 25.5 |
| Portuguese | 40 | 13.8 |
| Russian | 2 | 0.7 |
| Slovak | 1 | 0.3 |
| South African | 8 | 2.8 |
| Spanish | 12 | 4.1 |
| Swedish | 3 | 1.0 |
| Swiss | 2 | 0.7 |
| Vietnamese | 1 | 0.3 |
| Welsh | 2 | 0.7 |
| Total | 290 (1 missing) | 100 % |

**Supplementary materials for the main study**

**Table B.** *Overall results for the 95 AI-based applications evaluated in the pre-test.*

| Application / AI agent ability | **Awareness** | | **Based on AI** | |
| --- | --- | --- | --- | --- |
|  | **% YES** | **% NO** | **% YES** | **% NO** |
| Assessing improvement in a student's academic performance | 50 | 50 | 41.3 | 58.7 |
| Automatic facial recognition | 96.2 | 3.8 | 76.9 | 23.1 |
| Automatic heart attack detector | 48.1 | 51.9 | 59.6 | 40.4 |
| Automatic home lights and heating manager | 94.2 | 5.8 | 65.4 | 34.6 |
| Automatic math equation solver | 78.8 | 21.2 | 59.6 | 40.4 |
| Automatic novel composer | 17.4 | 82.6 | 34.8 | 65.2 |
| automatic Rubik's cube solver | 50 | 50 | 59.6 | 40.4 |
| Automatic social media content selection | 78.3 | 21.7 | 87 | 13 |
| Automatic staff selections | 37 | 63 | 47.8 | 52.2 |
| Automatic text translator | 91.3 | 8.7 | 76.1 | 23.9 |
| Automatic textual descriptor of photo content | 57.7 | 42.3 | 65.4 | 34.6 |
| Autonomous and self-driving cars | 84.8 | 15.2 | 76.1 | 23.9 |
| Autonomous and self-driving public bus | 39.1 | 60.9 | 65.2 | 34.8 |
| Autonomous scrambled eggs cooker | 13 | 87 | 19.6 | 80.4 |
| Combining Different DNA Structures in Biotechnology Research | 37.1 | 62.9 | 65.7 | 34.3 |
| Command a robot explorer in space | 90.4 | 9.6 | 63.5 | 36.5 |
| Commercial products picker based on personal preferences | 93.5 | 6.5 | 91.3 | 8.7 |
| Composing a cooking recipe for a balanced diet | 65.7 | 34.3 | 65.7 | 34.3 |
| Control of air routes to avoid possible collisions | 73.9 | 26.1 | 45.7 | 54.3 |
| Control the movements of a robot autonomously | 80.8 | 19.2 | 65.4 | 34.6 |
| Create new chemical formulas to produce new elements and materials | 42.9 | 57.1 | 68.6 | 31.4 |
| Create new drugs independently to treat more patients | 22.9 | 77.1 | 51.4 | 48.6 |
| Detect if someone leaves a suitcase at the airport through image recognition | 40.4 | 59.6 | 55.8 | 44.2 |
| Detect potential symptoms of a disease with some accuracy | 41.3 | 58.7 | 67.4 | 32.6 |
| Determine personality traits from posts we've made on social media | 52.2 | 47.8 | 78.3 | 21.7 |
| Diagnose causes of chronic diseases with good reliability | 37.1 | 62.9 | 68.6 | 31.4 |
| Diagnose diabetes with some accuracy | 51.9 | 48.1 | 44.2 | 55.8 |
| Diagnose rare genetic diseases with some accuracy | 39.1 | 60.9 | 45.7 | 54.3 |
| Drafting lawyer arguments for legal cases | 17.4 | 82.6 | 50 | 50 |
| Easily manage expense reports in a managerial environment while reducing the margin of error | 53.8 | 46.2 | 61.5 | 38.5 |
| Evaluate soil moisture levels and plant health to determine the maturity level of a plantation | 40.4 | 59.6 | 51.9 | 48.1 |
| Extract relevant information from the Curriculum Vitae(s) of the candidate(s) and evaluate them for a job position | 53.8 | 46.2 | 73.1 | 26.9 |
| Formulate new mathematical models in science with good approximation | 48.6 | 51.4 | 80 | 20 |
| Generate images of natural landscapes that are actually non-existent | 50 | 50 | 52.2 | 47.8 |
| heart defect diagnosis by analyzing MRI images and comparing them to other data | 54.4 | 56.5 | 63 | 37 |
| Help people by monitoring their condition and the status of ongoing treatments by providing oversight and assistance through a virtual nurse (Molly) | 30.8 | 69.2 | 75 | 20 |
| Human language understanding | 74.3 | 25.7 | 82.9 | 17.1 |
| Identify on the basis of MRIs how many liters of blood per minute the heart can pump | 30.8 | 69.2 | 51.9 | 48.1 |
| Identify with some accuracy a criminal or criminal act | 26.9 | 73.1 | 53.8 | 46.2 |
| Improving people’s appearance in a selfie | 78.3 | 21.7 | 39.1 | 60.9 |
| Intelligent customer care assistants | 82.6 | 17.4 | 78.3 | 21.7 |
| Intelligent photo management software | 85.7 | 14.3 | 82.9 | 17.1 |
| Intelligent toys for kids | 80 | 20 | 71.4 | 28.6 |
| Lung cancer diagnosis with some accuracy through analysis and comparison of data | 54.4 | 45.7 | 58.7 | 41.3 |
| Make medical diagnoses with some degree of accuracy | 42.9 | 57.1 | 68.6 | 31.4 |
| Making new dishes and new seasonings never before thought of by humans | 15.4 | 84.6 | 44.2 | 55.8 |
| Monitor whether patients are following prescribed therapies (AiCure) | 21.2 | 78.8 | 53.8 | 46.2 |
| Music playlist picker based on personal preferences | 90.4 | 9.6 | 84.6 | 15.4 |
| New gastronomic recipes generator | 23.1 | 76.9 | 42.3 | 57.7 |
| offering assistance to elderly people | 28.6 | 71.4 | 51.4 | 48.6 |
| Online store app picker for smartphone | 94.3 | 5.7 | 85.7 | 14.3 |
| Optimize a patient's post-operative recovery by predicting when it will be time to discharge them from a hospital | 31.4 | 68.6 | 57.1 | 42.9 |
| Performing medical surgeries | 56.5 | 43.5 | 56.5 | 43.5 |
| Personal calendar day meetings automatic scheduler | 65.2 | 34.8 | 45.7 | 54.3 |
| Political propagnada chatbot | 73.9 | 26.1 | 71.7 | 28.3 |
| Predict a person's political orientation based on their behaviors | 57.1 | 42.9 | 62.9 | 37.1 |
| Predict lightning strikes with 80% reliability | 28.6 | 71.4 | 74.3 | 25.7 |
| Predict possible side effects of a drug | 30.8 | 69.2 | 50 | 50 |
| Predict whether a person will get a certain disease based on their health status | 37.1 | 62.9 | 57.1 | 42.9 |
| Predicting people's general behavior with their data | 65.7 | 34.3 | 85.7 | 14.3 |
| Prescribe medical and drug therapies with some accuracy | 21.7 | 78.3 | 47.8 | 52.2 |
| Prevent online tax fraud by monitoring our buying habits | 45.7 | 54.3 | 65.7 | 34.3 |
| Read an x-ray and produce a diagnosis | 22.9 | 77.1 | 68.6 | 31.4 |
| Recognize a person walking around a school suspiciously through image recognition | 25 | 75 | 50 | 50 |
| Recognizing a person's handwriting within a forensic case | 48.6 | 51.4 | 71.4 | 28.6 |
| Recognizing criminal behavior | 40 | 60 | 62.9 | 37.1 |
| Recognizing emotions from images | 63 | 37 | 52.6 | 17.4 |
| Recognizing patterns of behavior of potential criminal acts through city's cameras | 46.2 | 53.8 | 67.3 | 32.7 |
| Replace one person's face with another's face in a video creating manipulated but realistic videos | 82.7 | 17.3 | 61.5 | 38.5 |
| Replicate to perfection the recipes of the best chefs in the world | 26.9 | 73.1 | 46.2 | 53.8 |
| Responding to a chat by simulating a doctor's responses during a consultation | 37 | 63 | 69.6 | 30.4 |
| Restaurant picker based on personal preferences | 93.5 | 6.5 | 87 | 13 |
| Select the best babysitter for our children based on social content posted by job candidates/candidates | 48.6 | 51.4 | 57.1 | 42.9 |
| Sequencing and cataloging biological information in databases for genetic engineering | 57.1 | 42.9 | 74.3 | 25.7 |
| Shopping habits prediction | 88.6 | 11.4 | 88.6 | 11.4 |
| Simulate human mnemonic functions | 43.5 | 56.5 | 80.4 | 19.6 |
| Smart airfare prices prediction | 82.7 | 17.3 | 69.2 | 30.8 |
| Smart chess player | 84.8 | 15.2 | 84.8 | 15.2 |
| Smart e-mail assistants | 85.7 | 14.3 | 77.1 | 22.9 |
| Smart e-mail client | 73.9 | 26.1 | 84.8 | 15.2 |
| Smart plants recognition | 76.9 | 23.1 | 75 | 25 |
| Smartphone face recognition unlock | 91.4 | 8.6 | 91.4 | 8.6 |
| Social media contents smart picker | 94.2 | 5.8 | 86.5 | 13.5 |
| Speak in English to get real-time feedback on pronunciation | 59.6 | 40.4 | 69.2 | 30.8 |
| Speech to text applications | 91.3 | 8.7 | 84.8 | 15.2 |
| Stimulating the attention of children with autism with a series of educational games and exercises on the development of verbal and nonverbal communication (Ask Nao) | 42.9 | 57.1 | 74.3 | 25.7 |
| Suggest which investment funds to purchase based on market performance | 65.7 | 34.3 | 77.1 | 22.9 |
| Suggesting a partner for a relationship based on your own behaviors | 60 | 40 | 74.3 | 25.7 |
| Targeted advertising | 97.8 | 2.2 | 97.8 | 2.2 |
| Traffic lights control and management based on actual traffic flow through photo recognition | 56.5 | 43.5 | 73.9 | 26.1 |
| User profiling for targeted marketing campaigns | 80 | 20 | 85.7 | 14.3 |
| Voice assistants (Siri, Alexa, Google assistant) | 100 | 0 | 82.7 | 17.3 |
| Writing a meaningful tweet | 48.6 | 51.4 | 74.3 | 25.7 |
| Writing a sports summary of a match | 17.3 | 82.7 | 44.2 | 55.8 |
| Writing a stock market performance report | 51.9 | 48.1 | 50 | 50 |

**Table C.** *Full list of participants' nationalities for the Main Study.*

|  | **N** | **%** |
| --- | --- | --- |
| UK | 197 | 49.5 |
| US | 201 | 50.5 |
| Total | 398 | 100% |

**Description given for the 25 tested applications in the Main Study**

Artificial intelligence is generally defined as a computer system’s attempt to perform tasks that require human intelligence.

To do so, the computer is “taught” to learn, reason, and self-correct. This process is sometimes called "deep learning". It makes assumptions, assesses models and re-evaluates huge amount of data and large datasets as input to reveal patterns, trends and associations. This process is also known as "machine learning".

Artificial Intelligence can be used for predictive analytics, which makes assumptions and tests in order to predict future scenarios. As output, Artificial Intelligence-based algorithms provide detailed predictions without human intervention.

 
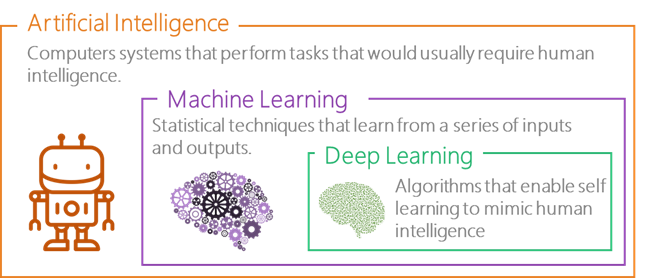


**Autonomous and self-driving cars**

Self-driving cars combine a variety of sensors to perceive their surroundings (e.g., radar, GPS, odometry). Advanced control systems interpret sensory information from other surroundings vehicles to identify appropriate navigation paths, as well as obstacles and relevant signage. Self-driving vehicles are cars and trucks in which human drivers are never required to take control to safely operate the vehicle. Also known as autonomous or 'driverless' cars, Artificial Intelligence algorithms combine data from the onboard sensors to control, navigate, and drive the vehicle autonomously.

**Smart chess player**   Artificial Intelligence-aided chess players use heuristic methods to build, search and evaluate trees representing sequences of chess moves from the current position, and attempt to execute the best such sequence during play. Smart chess player systems can learn by querying specific chess databases to search through a large library of historical games. Then they analyse them, check statistics, and draw up an opening repertoire. By playing with this kind of Artificial Intelligence-based applications, players can practice in the absence of human opponents.

**Targeted advertising**    Artificial Intelligence algorithms use search keywords that people enter into search engines to compute targeted advertising based on people’s interests. To do this, applications based on Artificial Intelligence algorithms analyse users’ online digital traces (e.g., previous search behaviour, preferences entered in registration forms, interests described on social network personal profiles). Personal data are collected from multiple websites through online tracking systems (such as cookies). Artificial Intelligence algorithms aggregate and process this information in order to profile people and offer targeted advertisements that meet their specific interests.

**Automatic text translation**  Automatic text translation systems are Artificial Intelligence-based applications that automatically converts text from a source language to text in the output language without the need for a human translator. To do so, these applications use the concept of probabilities to refer to a set of target segments, then choose the most likely words or phrases as a match to the source segment. In other words, by processing billions of text strings from websites and books published online, the application translates languages by finding the highest statistical probabilities that a translation is correct.

**Social Media Chatbots**    Social media bots are Artificial Intelligence-enabled chatbots powered by Natural Language Processing algorithms used to automate tasks and carry conversations with humans by chat. They can deliver targeted content and anticipate user reactions. They can sound very human, even if they are automated and controlled by code.Social media platforms (e.g., Facebook, Twitter) openly analyse users’ activities by capturing various information. These algorithms are trained by analysing people’s personal data (such as preferences and online searches) that are collected from multiple websites and databases by third party services through online tracking systems (such as cookies).

**Products and services recommendations (restaurants, music, app. Etc)**    These Artificial Intelligence applications aggregate and process users’ information in order to offer targeted products and services that meet their specific interests. The algorithm identifies and utilizes patterns of customers’ choices and/or location to link them to other products or services that are likely to be of interest. To do that, the Artificial intelligence collects people’s previous online search behaviour (e.g., products people have searched for online, music they have listened to, restaurants they have been to, preferences entered in registration forms on online markets and interests described on social network personal profiles).

**Shopping habits prediction**    Artificial Intelligence can predict shopping habits based on patterns identified in people’s shopping behaviours. Retailers can offer related products also based on data from a broader customer set. These systems enable bulk analysis of multiple data (e.g., previous search behaviour, preferences entered in registration forms and interests described on social network personal profiles). These data are collected from multiple websites by third party services through online tracking systems (such as internet cookies), and then used to train the Artificial Intelligence. Then, data is cross-referenced with the interactions that people make with the content of a specific social media, to suggest the most interesting contents.

**Intelligent photo management software**    Artificial Intelligence algorithms can transform users’ disorganized libraries usually composed by thousands of untagged photos into searchable databases of pictures. Several online and free services can do this very quickly. To do so, algorithms are trained on millions of images so that they can look for visual clues at the pixel level to help identify the category. Large photo storage services allow users to save their photos online for free, which can then be used as a training basis for the algorithm. Specific features, such as manual photo tagging, allow the algorithm to learn how to categorize pictures that will be uploaded in the future.

**Students' performance evaluation**    These Artificial Intelligence algorithms are used to create students’ profiles combining personal characteristics (interests, skills, fitness, affective status) with grades taken in previous semesters, creating a personal profile for each student and predicting his/her future performance. To do so, the Artificial Intelligence analyses overall grades obtained by students in two previous consecutive semesters, as well as their performance on different tests ad-hoc created (e.g., their personality or cognitive skills) that are stored in the school databases. Starting from these data, the Artificial Intelligence map each student’s individual learning plans and trajectories, suggesting the most appropriate course of study based on individual characteristics.

**Artificial Intelligence Medical Diagnostics**    Artificial Intelligence algorithms are adopted for medical diagnosis. For example, algorithms can be provided with clinical data (e.g., X-rays, tissue density, presence of carcinomas, etc.) from mammograms performed on previous patients for detecting the likelihood that those patients can then develop breast cancers, proving to be as accurate as the current double-reading system of two doctors. Artificial Intelligence algorithms are also adopted for detecting rare diseases. In this case, patient’s photos are analysed using facial analysis and deep learning to detect phenotypes that correlate with rare genetic diseases.

**Employees recruitment and selection**    These Artificial Intelligence algorithms can select the best candidates for a job position or make the first round of cuts when selecting candidates by analysing millions of social profiles. This Artificial Intelligence algorithm can also analyse how candidates answer preselected questions in a recorded video interview, grading their verbal responses and interpreting their facial expressions, hence capturing their mood, and assess their personality traits. By combining this information with their resumes, the algorithm can recommend the best candidate for a job position.

**Smart Airfare Prices prediction**    This Artificial Intelligence applications give the best prices they can find after users enter where they want to travel to and give a rough idea of the date. They can also provide a prediction on prices. Users are told whether the price is the best they are likely to get, or a better deal can come along in the future. To do this, an algorithm keep tracks of the price trend during the year by comparing different companies and accumulating a large amount of data on air flights. Learning from these data, the application is able to make an inference on future flight costs.

**Speech to text applications**   Speech to text application translates vocal speech into written text to be displayed on a screen support. To do this, applications such as Google Home assistant, Alexa and Siri digitize the sound by taking precise measurements of the wave at frequent intervals. Then, an Artificial Intelligence algorithm examines phonemes through a statistical model and compares them to a large library of known words, phrases and sentences. In order to train their artificial intelligence, speech to text applications record people’s vocal queries to create their library. The algorithm then determines what the user was probably saying and outputs it as text.

**Smart e-mails assistant**    Several e-mail providers (e.g., Gmail) have introduced Artificial Intelligence algorithms capable of identifying messages people should read first. To do so, an algorithm keep track of users’ habits (e.g., people most frequently contacted) and learn how they communicate with every contact in their inbox with the purpose to improve their relationships. It does so by analysing the relationship with each personal contact and providing data-supported tips on how to manage e-mail from that contact.These Artificial Intelligence applications utilises powerful analysis algorithms to investigate users’ communications and predict what’s important to them.

**Smart traffic management systems**    These Artificial Intelligence algorithms are able to analyse vast amounts of data in real time to control traffic jams. Through cameras that automatically detect vehicles, the information is sent to a control centre where algorithms estimate the density of the traffic. The system then alters the traffic lights based on real-time road congestions. Data for training the Artificial intelligence are provided by traffic monitoring systems, road infrastructure, cars and drivers themselves via their mobile phones (i.e., smartphone GPS data). The Artificial Intelligence processes this information to come up with the best way to move traffic depending on the most optimal way of keeping traffic moving.

**Political propaganda chatbots**    A chatbot for political propaganda is an artificial intelligence algorithm that is designed to post political messages online. The newsfeeds of social media (e.g., Twitter, Facebook, etc.) are largely populated with images, articles, and memes based on a user’s engagement history. Today, chatbotspowered by Natural Language Processing algorithms can create and post political contents for gaining people’s attention. To do so, these software agents can navigate previous users’ conversations and analyse their personal data to deliver customised news, video, memes and images for political propaganda.

**Intelligent Customer Care Assistants**   An Intelligent Customer Care Assistant is an artificial intelligence-based chatbot that has been designed to assist customers with basic tasks, usually providing information by using natural language.Intelligent Customer Care Assistants are able to answer questions about a product or a service sold by a company through written text in a chat and vocally. Artificial Intelligence-based algorithm analyses people’s previous online behaviour (e.g., the products users have searched for, preferences entered in registration forms, etc.), which are generally collected from multiple websites by third party services through online tracking systems (such as internet cookies) to train the Artificial Intelligence.

**Voice assistants (Siri, Alexa, Google assistant)**    Voice assistants react to voice commands and give users relevant information about their inquiry. Voice assistants are able to process orders of products, answer questions, perform actions like playing music and start a simple phone call with a friend. Voice-enabled smart speakers have a microphone to “hear” and speakers to communicate back to us or play music. To learn a language, these Artificial intelligence applications need hundreds of hours of hundreds of peoples speaking. To do that, vocal assistants usually track and record how real users talk to their assistant, improving the performance of the algorithm over time.

**Automatic Social media content selection**    Social media Artificial Intelligence-based algorithms determine what content to present based on users’ behaviour (e.g., previous watched videos, previous online purchases, products users have searched for, information entered in personal social media profiles, etc.). These data are collected from multiple websites by third party services through online tracking systems (such as internet cookies). They are then cross-referenced with the interactions that people make with the content of a specific social media in order to understand and predict their behaviour, thus being able to suggest the most interesting contents.

**Automatic Facial recognition**    Automated facial recognition technologycan recognize people's faces and categorize them. Two primary steps are repeatedly performed: first, detecting a face within an image and represent the measurements of key facial features of the detected face. Second, comparing two or more of these representations in order to determine their facial similarity. Large photo storage services allow users to save their photos online for free. These images can be used to train the Artificial Intelligence system along with manual photo tagging, which allow the algorithm to learn how to recognize people in the pictures that will be uploaded in the future.

**User profiling for targeted marketing campaigns**    User Profiling can identify data about users’ specific interest by extracting their information from different online sources in order to provide them with personalized services and advertisement. To do this, an Artificial Intelligence-based algorithm analyses people previous online behaviour, the products users have searched for, preferences entered in registration forms or interests described on their personal profiles which help user profiling system gather information about people. Very often the data does not come from a single source. Personal data are collected from multiple websites by third party services and then used to train the Artificial Intelligence

**Intelligent toys for kids**    Intelligent toys are equipped with their own Artificial Intelligence through on-board gadgets. The toys are connected to the internet (e.g., via home WiFi) and send data to the supplier data center. All child’s conversations with the toy, and those with other children and adults who also interact with it, are recorded and transmitted online to a voice analysis system to train the Artificial Intelligence. In this way, Intelligent toys can learn their owner's behaviour and be better able to talk to the child and become his/her “friend

**Artificial Intelligence-assisted surgery**    Artificial intelligence-based robots can analyse data from pre-op medical records to guide a surgeon's instrument during surgery, which can lead to a reduction in a patient's hospital stay. Robot-assisted surgery is considered "minimally invasive" so patients won't need to heal from large incisions. Artificial Intelligence is trained on data from other patients and past operations so that Artificial intelligence-based surgeon robots can automatically elaborate new surgical techniques. For example, some miniature robots, can make smaller incision on the chest to perform mapping and therapy over the surface of the heart.

**Artificial intelligence-based drugs combination**    These Artificial Intelligence algorithms can combine personalized drugs therapy for delivering the best drugs combination for each patient. By taking a small sample of blood or bone marrow from a person and comparing it with different databases with data from other patients, the algorithm can map how certain combinations of drugs will affect each person’s cancer cells. The Artificial Intelligence algorithm can mathematically derive what the best drug combinations are without any knowledge of how exactly a disease (e.g., cancer) works.

**Thieves and suspicious persons recognition**    These Artificial Intelligence algorithm can hunt for potential suspicious persons by using footage from security cameras. The cameras collect images of people present in a large space (e.g., a school, a shopping mall) for identifying possible thieves or dangerous people. These applications are based on automated facial recognition technologythatcan recognize people's faces and it is used to prevent potentially dangerous people — like someone barred by a restraining order — from entering in the monitored area. To do this, the algorithm combines facial recognition data with police database data to identify suspects.

**Table D**. *Results of exploratory and confirmatory factor analyses for the app evaluated in the pre-test for the Main study.*

|  | Exploratory factor analysis | | | Confirmatory factor analysis | | | α | |
| --- | --- | --- | --- | --- | --- | --- | --- | --- |
|  | Number of extracted factors | Barlett’s Test of Sphericity | KMO  (min value) | CFI | SRMR | RMSEA | Social Value | Social Risk |
| Assisted surgery | 2 | χ2 (15)=632, *p<*.001 | .73 | 0.97 | 0.03 | 0.09 | .82 | .89 |
| Automatic Facial recognition | 2 | χ2 (15)=659, *p<*.001 | .71 | 0.97 | 0.04 | 0.09 | .84 | .88 |
| Automatic Social media content selection | 2 | χ2 (15)=654, *p<*.001 | .64 | 0.98 | 0.04 | 0.06 | .83 | .87 |
| Automatic text translator | 2 | χ2 (15)=522, *p<*.001 | .63 | 1.00 | 0.01 | 0.00 | .77 | .88 |
| Autonomous and self-driving cars | 2 | χ2 (15)=583, *p<*.001 | .64 | 0.98 | 0.04 | 0.07 | .68 | .91 |
| Drugs combination | 2 | χ2 (15)=643, *p<*.001 | .72 | 0.98 | 0.02 | 0.08 | .75 | .90 |
| Employees recruitment and selection | 2 | χ2 (15)=671, *p<*.001 | .72 | 1.00 | 0.02 | 0.00 | .79 | .90 |
| Intelligent customer care assistant | 2 | χ2 (15)=567, *p<*.001 | .66 | 0.99 | 0.02 | 0.04 | .83 | .92 |
| Intelligent photo management software | 2 | χ2 (15)=529, *p<*.001 | .62 | 0.96 | 0.07 | 0.11 | .83 | .87 |
| Intelligent toys for kids | 2 | χ2 (15)=600, *p<*.001 | .70 | 0.99 | 0.02 | 0.03 | .77 | .87 |
| Medical Diagnostics | 2 | χ2 (15)=617, *p<*.001 | .71 | 0.98 | 0.04 | 0.07 | .80 | .88 |
| Political propaganda chatbots | 2 | χ2 (15)=805, *p<*.001 | .67 | 0.99 | 0.02 | 0.05 | .81 | .85 |
| Products and services recommendations (restaurants, music, app. Etc) | 2 | χ2 (15)=593, *p<*.001 | .64 | 0.99 | 0.04 | 0.05 | .82 | .88 |
| Shopping habits prediction | 2 | χ2 (15)=645, *p<*.001 | .64 | 1.00 | 0.03 | 0.00 | .79 | .88 |
| Smart Airfare Prices prediction | 2 | χ2 (15)=550, *p<*.001 | .70 | 1.00 | 0.02 | 0.00 | .79 | .89 |
| Smart chess player | 2 | χ2 (15)=607, *p<*.001 | .71 | 0.99 | 0.02 | 0.05 | .89 | .83 |
| Smart e-mails assistant | 2 | χ2 (15)=592, *p<*.001 | .64 | 0.96 | 0.04 | 0.11 | .79 | .91 |
| Smart traffic management systems | 2 | χ2 (15)=588, *p<*.001 | .72 | 0.96 | 0.04 | 0.11 | .81 | .91 |
| Social Media Chatbots | 2 | χ2 (15)=705, *p<*.001 | .65 | 1.00 | 0.02 | 0.00 | .84 | .91 |
| Speech to text application | 2 | χ2 (15)=642, *p<*.001 | .68 | 0.98 | 0.02 | 0.07 | .82 | .89 |
| Students’ performance evaluation | 2 | χ2 (15)=732, *p<*.001 | .68 | 0.98 | 0.02 | 0.08 | .83 | .89 |
| Targeted advertising | 2 | χ2 (15)=602, *p<*.001 | .67 | 0.99 | 0.03 | 0.03 | .83 | .89 |
| Thieves and suspicious persons recognition | 2 | χ2 (15)=868, *p<*.001 | .80 | 1.00 | 0.01 | 0.00 | .87 | .91 |
| User profiling for targeted marketing campaigns | 2 | χ2 (15)=614, *p<*.001 | .71 | 1.00 | 0.03 | 0.00 | .80 | .93 |
| Voice assistants (Siri, Alexa, Google assistant) | 2 | χ2 (15)=523, *p<*.001 | .65 | 0.99 | 0.02 | 0.04 | .84 | .88 |

**Table E**. *Pearsons’s correlation between social value and social risk for the tested AI applications.*

| **App** | ***r*** | ***p*** | ***N*** |
| --- | --- | --- | --- |
| Assisted surgery | -.449 | *<.001* | 201 |
| Automatic Facial recognition | -.353 | *<.001* | 201 |
| Automatic Social media content selection | -.295 | *<.001* | 201 |
| Automatic text translator | -.121 | *.089* | 198 |
| Autonomous and self-driving cars | -.364 | *<.001* | 198 |
| Drugs combination | -.410 | *<.001* | 201 |
| Employees recruitment and selection | -.447 | *<.001* | 198 |
| Intelligent customer care assistant | -.198 | *.005* | 201 |
| Intelligent photo management software | -.047 | *.510* | 198 |
| Intelligent toys for kids | -.398 | *<.001* | 201 |
| Medical Diagnostics | -.326 | *<.001* | 198 |
| Political propaganda chatbots | -.317 | *<.001* | 201 |
| Products and services recommendations (e.g., restaurants, music, app) | -.157 | *.028* | 198 |
| Shopping habits prediction | -.155 | *.029* | 198 |
| Smart Airfare Prices prediction | .157 | *.101* | 198 |
| Smart chess player | .313 | *<.001* | 198 |
| Smart e-mails assistant | -.286 | *<.001* | 201 |
| Smart traffic management systems | -.405 | *<.001* | 201 |
| Social Media Chatbots | -.199 | *.005* | 198 |
| Speech to text application | -.334 | *<.001* | 201 |
| Students’ performance evaluation | -.319 | *<.001* | 198 |
| Targeted advertising | -.214 | *.002* | 198 |
| Thieves and suspicious persons recognition | -.603 | *<.001* | 201 |
| User profiling for targeted marketing campaigns | -.318 | *<.001* | 201 |
| Voice assistants (Siri, Alexa, Google assistant) | -.346 | *<.001* | 201 |

Correlation analyses were used to explore the associations between risk and value by considering each application separately. Results confirmed what emerged in the preliminary study, highlighting a negative and significant correlation between the two dimensions for all the apps (rs ≤ -.158, ps ≤ .028), except for smart chess player, r = .313, p <.001, and airfare prices prediction, automatic text translator and smart photo management, whose correlations were not significant, ps ≥ .089.

**Table F**. *Social risk and social value means and respective clusters for each application tested.*

| **AI based application** | **Social value mean score** | **Social Risk mean score** | **Cluster** |
| --- | --- | --- | --- |
| Intelligent toys for kids | 3.68 | 2.09 | 1 |
| Employees recruitment and selection | 3.47 | 2.27 | 1 |
| Face recognition | 3.56 | 2.43 | 1 |
| Smart photo management | 3.04 | 2.41 | 1 |
| Shopping habits prediction | 3.16 | 2.39 | 1 |
| Social media contents smart picker | 3.28 | 2.18 | 1 |
| Social media chatbots | 3.38 | 2.19 | 1 |
| Targeted advertising | 3.39 | 2.17 | 1 |
| User profiling for targeted marketing campaigns | 3.45 | 2.37 | 1 |
| Assisted surgery | 2.58 | 3.93 | 2 |
| Drugs combination | 2.78 | 3.93 | 2 |
| Medical diagnostics | 2.83 | 3.70 | 2 |
| Smart airfare prices prediction | 2.24 | 3.12 | 3 |
| Automatic text translator | 2.22 | 3.52 | 3 |
| Speech to text applications | 2.57 | 3.41 | 3 |
| Smart traffic management systems | 2.37 | 3.75 | 3 |
| Smart chess player | 1.60 | 2.16 | 4 |
| Intelligent customer care assistants | 2.79 | 2.82 | 5 |
| Smart e-mail management | 2.97 | 2.65 | 5 |
| Products and services recommendations | 2.93 | 2.58 | 5 |
| Autonomous and self-driving cars | 3.14 | 3.11 | 5 |
| Students’ performance evaluation | 3.16 | 2.66 | 5 |
| Thieves and suspicious persons recognition | 3.34 | 3.13 | 5 |
| Voice assistants (Siri, Alexa, Google assistant) | 3.17 | 3.06 | 5 |
| Political propaganda chatbot | 3.90 | 1.66 | 6 |
